# Supplementary material
Source: ML conference proceedings conference paper supplement (https://proceedings.neurips.cc/paper_files/paper/2017/hash/b432f34c5a997c8e7c806a895ecc5e25-Abstract.html)
Supplement: Supplementary file [file b432f34c5a997c8e7c806a895ecc5e25-Supplemental.zip]

---

# Multi-Objective Non-parametric Sequential Prediction

---

## 1 Proofs of helping lemmas

**Lemma 2** (Continuity and Minimax). *Let  $\mathcal{Y}, \Lambda, \mathcal{X}$  be compact real spaces.  $l : \mathcal{Y} \times \Lambda \times \mathcal{X} \rightarrow \mathbb{R}$  be a continuous function. Denote by  $\mathbb{P}(\mathcal{X})$  the space of all probability measures on  $\mathcal{X}$  (equipped with the topology of weak-convergence). Then the following function  $L^* : \mathbb{P}(\mathcal{X}) \rightarrow \mathbb{R}$  is continuous*

$$L^*(\mathbb{Q}) = \inf_{y \in \mathcal{Y}} \sup_{\lambda \in \Lambda} \mathbb{E}_{\mathbb{Q}} [l(y, \lambda, x)]. \quad (1)$$

Moreover, for any  $\mathbb{Q} \in \mathbb{P}(\mathcal{X})$ ,

$$\inf_{y \in \mathcal{Y}} \sup_{\lambda \in \Lambda} \mathbb{E}_{\mathbb{Q}} [l(y, \lambda, x)] = \sup_{\lambda \in \Lambda} \inf_{y \in \mathcal{Y}} \mathbb{E}_{\mathbb{Q}} [l(y, \lambda, x)].$$

*Proof.*  $\mathcal{Y}, \Lambda, \mathcal{X}$  are compact, implying that the function  $l(y, \lambda, x)$  is bounded. Therefore, the function  $L : \mathcal{Y} \times \Lambda \times \mathbb{P}(\mathcal{X}) \rightarrow \mathbb{R}$ , defined as

$$L(y, \lambda, \mathbb{Q}) = \mathbb{E}_{\mathbb{Q}} [l(y, \lambda, x)], \quad (2)$$

is continuous. By applying Proposition 7.32 from [2], we have that  $\sup_{\lambda \in \Lambda} \mathbb{E}_{\mathbb{Q}} [l(y, \lambda, X)]$  is continuous in  $\mathbb{Q} \times \mathcal{Y}$ . Again applying the same proposition, we get the desired result. The last part of the lemma follows directly from Fan's minimax theorem [3].  $\square$

**Lemma 3** (Continuity of the optimal selection). *Let  $\mathcal{Y}, \Lambda, \mathcal{X}$  be compact real spaces, and let  $L$  be as defined in Equation (2). Then, there exist two measurable selection functions  $h^X, h^\lambda$  such that*

$$h^y(\mathbb{Q}) \in \arg \min_{y \in \mathcal{Y}} \left( \max_{\lambda \in \Lambda} L(y, \lambda, \mathbb{Q}) \right),$$

$$h^\lambda(\mathbb{Q}) \in \arg \max_{\lambda \in \Lambda} \left( \min_{y \in \mathcal{Y}} L(y, \lambda, \mathbb{Q}) \right)$$

for any  $\mathbb{Q} \in \mathbb{P}(\mathcal{X})$ . Moreover, let  $L^*$  be as defined in Equation (1). Then, the set

$$Gr(L^*) \triangleq \{(u^*, v^*, \mathbb{Q}) \mid u^* \in h^y(\mathbb{Q}), v^* \in h^\lambda(\mathbb{Q}), \mathbb{Q} \in \mathbb{P}(\mathcal{X})\},$$

is closed in  $\mathcal{Y} \times \Lambda \times \mathbb{P}(\mathcal{X})$ .

*Proof.* The first part of the proof follows immediately from the minimax measurable theorem of [8] due to the compactness of  $\mathcal{Y}, \Lambda, \mathcal{X}$  and the properties of the loss function  $L$ . The proof of the second part is similar to the one presented in Theorem 3 of [1]. In order to show that  $Gr(L^*)$  is closed, it is enough to show that if (i)  $\mathbb{Q}_n \rightarrow \mathbb{Q}_\infty$  in  $\mathbb{P}(\mathcal{X})$ ; (ii)  $u_n \rightarrow u_\infty$  in  $\mathcal{Y}$ ; (iii)  $v_n \rightarrow v_\infty$  in  $\Lambda$  and (iv)  $u_n \in h^y(\mathbb{Q}_n), v_n \in h^\lambda(\mathbb{Q}_n)$  for all  $n$ , then,

$$u_\infty \in h^y(\mathbb{Q}_\infty), v_\infty \in h^\lambda(\mathbb{Q}_\infty).$$

The function  $L(y, \lambda, \mathbb{Q})$ , as defined in Equation (2), is continuous. Therefore,

$$\lim_{n \rightarrow \infty} L(u_n, v_n, \mathbb{Q}_n) = L(u_\infty, v_\infty, \mathbb{Q}_\infty).$$

It remains to show that  $u_\infty \in h^y(\mathbb{Q}_\infty)$  and  $v_\infty \in h^\lambda(\mathbb{Q}_\infty)$ . From the optimality of  $u_n$  and  $v_n$ , we obtain

$$L(u_\infty, v_\infty, \mathbb{Q}_\infty) = \lim_{n \rightarrow \infty} L(u_n, v_n, \mathbb{Q}_n) = \lim_{n \rightarrow \infty} L^*(\mathbb{Q}_n). \quad (3)$$

Finally, from the continuity of  $L^*$  (Lemma 2), we get

$$(3) = L^*(\lim_{n \rightarrow \infty} \mathbb{Q}_n) = L^*(\mathbb{Q}_\infty),$$

which gives the desired result.  $\square$

**Corollary 1.** *Under the conditions of Lemma 3. Define  $L_n(y, \lambda, \mathbb{Q}) = L(y, \lambda, \mathbb{Q}) + \frac{\|y\|^2 - \|\lambda\|^2}{n}$  and denote  $h_{L_n}^y(\mathbb{Q}_n), h_{L_n}^\lambda(\mathbb{Q}_n)$  to be the measurable selection functions of  $L_n$ . If  $\mathbb{Q}_n \rightarrow \mathbb{Q}_\infty$  weakly in  $\mathbb{P}(\mathcal{X})$  and  $u_n \in h_{L_n}^y(\mathbb{Q}_n), v_n \in h_{L_n}^\lambda(\mathbb{Q}_n)$ , then*

$$L_n(u_n, v_n, \mathbb{Q}_n) \rightarrow L(u_\infty, v_\infty, \mathbb{Q}_\infty)$$

almost surely for  $u_\infty \in h^y(\mathbb{Q}_\infty)$  and  $v_\infty \in h^\lambda(\mathbb{Q}_\infty)$ .

*Proof.* Denote  $\hat{u}_n \in h^y(\mathbb{Q}_\infty)$  and  $\hat{v}_n \in h^\lambda(\mathbb{Q}_\infty)$

$$\begin{aligned} & |L_n(u_n, v_n, \mathbb{Q}_n) - L(u_\infty, v_\infty, \mathbb{Q}_\infty)| \\ & \leq |L_n(u_n, v_n, \mathbb{Q}_n) - L(\hat{u}_n, \hat{v}_n, \mathbb{Q}_n)| + |L(\hat{u}_n, \hat{v}_n, \mathbb{Q}_n) - L(u_\infty, v_\infty, \mathbb{Q}_\infty)|. \end{aligned} \quad (4)$$

Note that for every  $n$  and for constant  $E > 0$ ,

$$\begin{aligned} \min_{y \in \mathcal{Y}} \max_{\lambda \in \Lambda} L(y, \lambda, \mathbb{Q}) - \frac{\|\lambda_{\max}\|^2}{n} & \leq \min_{y \in \mathcal{Y}} \max_{\lambda \in \Lambda} L_n(y, \lambda, \mathbb{Q}) \\ & = \min_{y \in \mathcal{Y}} \max_{\lambda \in \Lambda} \left( \mathbb{E}_{\mathbb{Q}} [l(y, \lambda, X)] + \frac{\|y\|^2 - \|\lambda\|^2}{n} \right) \\ & \leq \min_{y \in \mathcal{Y}} \max_{\lambda \in \Lambda} L(y, \lambda, \mathbb{Q}) + \frac{E}{n}. \end{aligned}$$

Thus, for some constant  $C$ ,  $|L_n(u_n, v_n, \mathbb{Q}_n) - L(u_\infty, v_\infty, \mathbb{Q}_\infty)| < \frac{C}{n}$  and from Lemma 3, the last summand also converges to 0 as  $n$  approaches  $\infty$ , we get the desired result, and clearly, if  $h^y(\mathbb{Q}_\infty)$  and  $h^\lambda(\mathbb{Q}_\infty)$  are singletons, then, the only accumulation point of  $\{(v_n, u_n)\}_{n=1}^\infty$  is  $(v_\infty, u_\infty)$ .  $\square$

## 2 Proof of Theorem 1

**Theorem 1** (Optimality of  $\mathcal{V}^*$ ). *Let  $\{X_i\}_{i=-\infty}^\infty$  be a  $\gamma$ -feasible process. Then, for any strategy  $\mathcal{S} \in \mathcal{S}_\gamma$ , the following holds a.s.*

$$\liminf_{N \rightarrow \infty} \frac{1}{N} \sum_{i=1}^N u(\mathcal{S}(X_1^{i-1}), X_i) \geq \mathcal{V}^*.$$

*Proof.* For any given strategy  $\mathcal{S} \in \mathcal{S}_\gamma$ , we will look at the following sequence:

$$\frac{1}{N} \sum_{i=1}^N l(\mathcal{S}(X_1^{i-1}), \tilde{\lambda}_i^*, X_i). \quad (5)$$

where  $\tilde{\lambda}_i^* \in h^\lambda(\mathbb{P}_{X_i|X_1^{i-1}})$ . Observe that

$$\begin{aligned} (5) &= -\frac{1}{N} \sum_{i=1}^N \left( l(\mathcal{S}(X_1^{i-1}), \tilde{\lambda}_i^*, X_i) - \mathbb{E} \left[ l(\mathcal{S}(X_1^{i-1}), \tilde{\lambda}_i^*, X) \mid X_1^{i-1} \right] \right) \\ &\quad + \frac{1}{N} \sum_{i=1}^N \mathbb{E} \left[ l(\mathcal{S}(X_1^{i-1}), \tilde{\lambda}_i^*, X_i) \mid X_1^{i-1} \right]. \end{aligned}$$

Since  $A_i = l(S(X_1^{i-1}), \tilde{\lambda}_i^*, X_i) - \mathbb{E} [l(S(X_1^{i-1}), \tilde{\lambda}_i^*, X_i) | X_1^{i-1}]$  is a martingale difference sequence, the last summand converges to 0 a.s., by the strong law of large numbers (see, e.g., [9]). Therefore,

$$\begin{aligned} \liminf_{N \rightarrow \infty} \frac{1}{N} \sum_{i=1}^N l(S(X_1^{i-1}), \tilde{\lambda}_i^*, X_i) &= \liminf_{N \rightarrow \infty} \frac{1}{N} \sum_{i=1}^N \mathbb{E} [l(S(X_1^{i-1}), \tilde{\lambda}_i^*, X_i) | X_1^{i-1}] \\ &\geq \liminf_{N \rightarrow \infty} \frac{1}{N} \sum_{i=1}^N \min_{y \in \mathcal{Y}()} \mathbb{E} [l(y, \tilde{\lambda}_i^*, X_i) | X_1^{i-1}], \end{aligned} \quad (6)$$

where the minimum is taken w.r.t. all the  $\sigma(X_1^{i-1})$ -measurable functions. Because the process is stationary, we get for  $\hat{\lambda}_i^* \in h^\lambda(\mathbb{P}_{X_0|X_1^{i-1}})$ ,

$$(6) = \liminf_{N \rightarrow \infty} \frac{1}{N} \sum_{i=1}^N \min_{y \in \mathcal{Y}()} \mathbb{E} [l(y, \hat{\lambda}_i^*, X_0) | X_1^{i-1}] \quad (7)$$

$$= \liminf_{N \rightarrow \infty} \frac{1}{N} \sum_{i=1}^N L^*(\mathbb{P}_{X_0|X_1^{i-1}}). \quad (8)$$

Using Levy's zero-one law,  $\mathbb{P}_{X_0|X_1^{i-1}} \rightarrow \mathbb{P}_\infty$  weakly as  $i$  approaches  $\infty$  and from Lemma 2 we know that  $L^*$  is continuous. Therefore, we can apply Lemma 1 and get that a.s.

$$(8) = \mathbb{E} [L^*(\mathbb{P}_\infty)] = \mathbb{E} [\mathbb{E}_{\mathbb{P}_\infty} [l(y_\infty^*, \lambda_\infty^*, X_0)]] = \mathbb{E} [\mathcal{L}(y_\infty^*, \lambda_\infty^*, X_0)]. \quad (9)$$

Note also, that due to the complementary slackness condition of the optimal solution, i.e.,  $\lambda_\infty^*(\mathbb{E}_{\mathbb{P}_\infty} [c(y_\infty^*, X_0)] - \gamma) = 0$ , we get

$$(9) = \mathbb{E} [\mathbb{E}_{\mathbb{P}_\infty} [u(y_\infty^*, X_0)]] = \mathcal{V}^*.$$

From the uniqueness of  $\lambda_\infty^*$ , and using Lemma 3  $\hat{\lambda}_i^* \rightarrow \lambda_\infty^*$  as  $i$  approaches  $\infty$ . Moreover, since  $l$  is continuous on a compact set,  $l$  is also uniformly continuous. Therefore, for any given  $\epsilon > 0$ , there exists  $\delta > 0$ , such that if  $|\lambda' - \lambda| < \delta$ , then

$$|l(y, \lambda', x) - l(y, \lambda, x)| < \epsilon$$

for any  $y \in \mathcal{Y}$  and  $x \in \mathcal{X}$ . Therefore, there exists  $i_0$  such that if  $i > i_0$  then  $|l(y, \hat{\lambda}_i^*, x) - l(y, \lambda_\infty^*, x)| < \epsilon$  for any  $y \in \mathcal{Y}$  and  $x \in \mathcal{X}$ . Thus,

$$\begin{aligned} &\liminf_{N \rightarrow \infty} \frac{1}{N} \sum_{i=1}^N l(S(X_1^{i-1}), \lambda_\infty^*, X_i) - \liminf_{N \rightarrow \infty} \frac{1}{N} \sum_{i=1}^N l(S(X_1^{i-1}), \hat{\lambda}_i^*, X_i) \\ &= \liminf_{N \rightarrow \infty} \frac{1}{N} \sum_{i=1}^N l(S(X_1^{i-1}), \lambda_\infty^*, X_i) + \limsup_{N \rightarrow \infty} \frac{1}{N} \sum_{i=1}^N -l(S(X_1^{i-1}), \hat{\lambda}_i^*, X_i) \\ &\geq \liminf_{N \rightarrow \infty} \frac{1}{N} \sum_{i=1}^N l(S(X_1^{i-1}), \hat{\lambda}_i^*, X_i) - \frac{1}{N} \sum_{i=1}^N l(S(X_1^{i-1}), \lambda_\infty^*, X_i) \geq -\epsilon \text{ a.s.}, \end{aligned}$$

and since  $\epsilon$  is arbitrary,

$$\liminf_{N \rightarrow \infty} \frac{1}{N} \sum_{i=1}^N l(S(X_1^{i-1}), \lambda_\infty^*, X_i) \geq \liminf_{N \rightarrow \infty} \frac{1}{N} \sum_{i=1}^N l(S(X_1^{i-1}), \hat{\lambda}_i^*, X_i).$$

Therefore we can conclude that

$$\liminf_{N \rightarrow \infty} \frac{1}{N} \sum_{i=1}^N l(S(X_1^{i-1}), \lambda_\infty^*, X_i) \geq \mathcal{V}^* \text{ a.s.}$$

We finish the proof by noticing that since  $S \in \mathcal{S}_\gamma$ , then by definition

$$\limsup_{N \rightarrow \infty} \frac{1}{N} \sum_{i=1}^N c(S(X_1^{i-1}), X_i) \leq \gamma \text{ a.s.}$$

and since  $\lambda_\infty^*$  is non negative, we will get the desired result.  $\square$

### 3 Proof of Theorem 2

**Theorem 2.** Assume that  $\{X_i\}_{i=-\infty}^{\infty}$  is a  $\gamma$ -feasible process. Then, it is possible to construct a countable set of experts  $\{H_{k,h}\}$  for which

$$\lim_{k \rightarrow \infty} \lim_{h \rightarrow \infty} \lim_{n \rightarrow \infty} \frac{1}{N} \sum_{i=1}^N l(y_{k,h}^i, \lambda_{k,h}^i, X_i) = \mathcal{V}^* \text{ a.s.,}$$

where  $(y_{k,h}^i, \lambda_{k,h}^i)$  are the predictions made by expert  $H_{k,h}$  at round  $i$ .

*Proof.* We start by defining a countable set of experts  $\{H_{k,h}\}$  as follow: For  $h = 1, 2, \dots$ , let  $P_h = \{A_{h,j} \mid j = 1, 2, \dots, m_h\}$  be a sequence of finite partitions of  $\mathcal{X}$  such that: (i) any cell of  $P_{h+1}$  is a subset of a cell of  $P_h$  for any  $h$ . Namely,  $P_{h+1}$  is a refinement of  $P_h$ ; (ii) for a set  $A$ , if  $\text{diam}(A) = \sup_{x,y \in A} \|x - y\|$  denotes the diameter of  $A$ , then for any sphere  $B$  centered at the origin,

$$\lim_{h \rightarrow \infty} \max_{j: A_{h,j} \cap B \neq \emptyset} \text{diam}(A_{h,j}) = 0.$$

Define the corresponding quantizer  $q_h(x) = j$ , if  $x \in A_{h,j}$ . Thus, for any  $n$  and  $X_1^n$ , we define  $Q_h(X_1^n)$  as the sequence  $q_h(x_1), \dots, q_h(x_n)$ . For expert  $H_{k,h}$ , we define for  $k > 0$ , a  $k$ -long string of positive integers, denoted by  $w$ , the following set,

$$B_{k,h}^{w,(1,n-1)} \triangleq \{x_i \mid k < i < n, Q_h(X_{i-k}^{i-1}) = w\}.$$

We define also

$$h_{k,h}^y(X_1^{n-1}, w) \triangleq \arg \min_{y \in \mathcal{Y}} \left( \max_{\lambda \in \Lambda} \frac{1}{|B_{k,h}^{w,(1,n-1)}|} \sum_{x_i \in B_{k,h}^{w,(1,n-1)}} l_{k,h,n}(y, \lambda, x_i) \right)$$

$$h_{k,h}^\lambda(X_1^{n-1}, w) \triangleq \arg \max_{\lambda \in \Lambda} \left( \min_{y \in \mathcal{Y}} \frac{1}{|B_{k,h}^{w,(1,n-1)}|} \sum_{x_i \in B_{k,h}^{w,(1,n-1)}} l_{k,h,n}(y, \lambda, x_i) \right)$$

for

$$l_{k,h,n}(y, \lambda, x) \triangleq l(y, \lambda, x) + (\|y\|^2 - \|\lambda\|^2) \left( \frac{1}{n} + \frac{1}{h} + \frac{1}{k} \right)$$

and we will set  $h_{k,h}^y(X_1^{n-1}, w) = y_0$  and  $h_{k,h}^\lambda(X_1^{n-1}, w) = \lambda_0$  for arbitrary  $(y_0, \lambda_0) \in \mathcal{Y} \times \Lambda$  if  $B_{k,h}^{w,(1,n-1)}$  is empty. Using the above, we define the predictions of  $H_{k,h}$  to be:

$$H_{k,h}^y(X_1^{n-1}) = h_{k,h}^y(X_1^{n-1}, Q(X_{n-k}^{n-1})), \quad n = 1, 2, 3, \dots$$

$$H_{k,h}^\lambda(X_1^{n-1}) = h_{k,h}^\lambda(X_1^{n-1}, Q(X_{n-k}^{n-1})), \quad n = 1, 2, 3, \dots$$

We will add two experts:  $H_{0,0}$  whose predictions are always  $(y_0, \lambda_{\max})$  and  $H_{-1,-1}$  whose predictions are always  $(y_0, 0)$ .

Fixing  $k, h > 0$  and  $w$ , we will define a (random) measure  $\mathbb{P}_{j,w}^{(k,h)}$  that is the measure concentrated on the set  $B_{k,h}^{w,(0,1-j)}$ , defined by

$$\mathbb{P}_{j,w}^{(k,h)}(A) = \frac{\sum_{X_i \in B_{k,h}^{w,(0,1-j)}} 1_A(X_i)}{|B_{k,h}^{w,(0,1-j)}|},$$

where  $1_A$  denotes the indicator function of the set  $A \subset \mathcal{X}$ . If the above set  $B_{k,h}^{w,(0,1-j)}$  is empty, then let  $P_{j,w}^{(k,h)}(A) = \delta(x')$  be the probability measure concentrated on arbitrary vector  $x' \in \mathcal{X}$ .

In other words,  $\mathbb{P}_{j,w}^{(k,h)}(A)$  is the relative frequency of the the vectors among  $X_{1-j+k}, \dots, X_0$  that fall in the set  $A$ . Applying Lemma 1 twice, it is straightforward to prove that for all  $w$ , w.p. 1

$$\mathbb{P}_{j,w}^{(k,h)} \rightarrow \begin{cases} \mathbb{P}_{X_0|G_l(X_{-k}^{-1})=w} & \mathbb{P}(G_l(X_{-k}^{-1}) = w) > 0 \\ \delta(x') & \text{otherwise} \end{cases}$$

weakly as  $j \rightarrow \infty$ , where  $\mathbb{P}_{X_0|G_l(X_{-k}^{-1})=w}$  denotes the distribution of the vector  $X_0$  conditioned on the event  $G_l(X_{-k}^{-1}) = w$ . To see this, let  $f$  be a bounded continuous function. Then,

$$\begin{aligned} \int f(x) \mathbb{P}_{j,w}^{(k,h)}(dx) &= \frac{\frac{1}{|1-j+k|} \sum_{X_i \in B_{k,h}^{w,(0,1-j)}} f(X_i)}{\frac{1}{|1-j+k|} |B_{k,h}^{w,(0,1-j)}|} \\ &\rightarrow \frac{\mathbb{E} [f(X_0) 1_{G_l(X_{-k}^{-1})=w}(X_0)]}{\mathbb{P}(G_l(X_{-k}^{-1}) = w)} = \mathbb{E} [f(X_0) | G_l(X_{-k}^{-1}) = w], \end{aligned}$$

and in case  $\mathbb{P}(\|X_{-k}^{-1} - s\| \leq c/l) = 0$ , then w.p. 1,  $\mathbb{P}_{j,w}^{(k,h)}$  is concentrated on  $x'$  for all  $j$ . We will denote the limit distribution of  $\mathbb{P}_{j,w}^{(k,h)}$  by  $\mathbb{P}_w^{*(k,h)}$ .

By definition,  $(h_{k,h}^y(X_{1-n}^{-1}, w), h_{k,h}^\lambda(X_{1-n}^{-1}, w))$  is the minimax of  $l_{n,k,h}$  w.r.t.  $\mathbb{P}_{j,w}^{(k,h)}$ . The sequence of functions  $l_{n,k,h}$  converges uniformly as  $n$  approaches  $\infty$  to

$$l_{k,h}(y, \lambda, x) = l(y, \lambda, x) + (\|y\|^2 - \|\lambda\|^2) \left( \frac{1}{h} + \frac{1}{k} \right).$$

Note also that for any fixed  $\mathbb{Q}$ ,  $L_{k,h}(y, \lambda, \mathbb{Q}) = \mathbb{E}_{\mathbb{Q}} [l_{k,h}(y, \lambda, X)]$  is strictly convex in  $y$  and strictly concave in  $\lambda$ , and therefore, has a unique saddle-point (see, e.g., [7]). Therefore, since  $w$  is arbitrary, and following a Corollary 1 of Lemma 3, we get that a.s.

$$y_{k,h}^n \rightarrow y_{k,h}^* \quad \lambda_{k,h}^n \rightarrow \lambda_{k,h}^*,$$

where  $(y_{k,h}^*, \lambda_{k,h}^*)$  is the minimax of  $L_{k,h}$  w.r.t.  $\mathbb{P}_{X_{-k}^{-1}}^{*(k,h)}$ . Thus, we can apply Lemma 1 and conclude that as  $N$  approaches  $\infty$ ,

$$\frac{1}{N} \sum_{i=1}^N l(y_{k,h}^i, \lambda_{k,h}^i, X_i) \rightarrow \mathbb{E} [l(y_{k,h}^*, \lambda_{k,h}^*, X_0)].$$

a.s.. We now evaluate

$$\lim_{h \rightarrow \infty} \mathbb{E} [l(y_{k,h}^*, \lambda_{k,h}^*, X_0)].$$

Using the properties of the partition  $P_h$  (see, e.g., [4, 5]), we get that

$$\mathbb{P}_{X_{-k}^{-1}}^{*(k,h)} \rightarrow \mathbb{P}_{\{X_0|X_{-k}^{-1}\}}$$

weakly as  $h \rightarrow \infty$ . Moreover, the sequence of functions  $l_{k,h}$  converges uniformly as  $h$  approaches  $\infty$

$$l_k(y, \lambda, x) = l(y, \lambda, x) + \frac{\|y\|^2 - \|\lambda\|^2}{k}.$$

Note also, that for any fixed  $\mathbb{Q}$ ,  $L_k(y, \lambda, \mathbb{Q}) = \mathbb{E}_{\mathbb{Q}} [l_k(y, \lambda, X)]$  is strictly convex-concave, and therefore, has a unique saddle point. Accordingly, by applying Corollary 1 again, we get that a.s.

$$y_{k,h}^* \rightarrow y_k^* \quad \lambda_{k,h}^* \rightarrow \lambda_k^*,$$

where  $(y_k^*, \lambda_k^*)$  is the minimax of  $L_k$  w.r.t.  $\mathbb{P}_{\{X_0|X_{-k}^{-1}\}}$ . Therefore, as  $h$  approaches  $\infty$ ,

$$l(y_{k,h}^*, \lambda_{k,h}^*, X_0) \rightarrow l(y_k^*, \lambda_k^*, X_0)$$

a.s.. Thus, by Lebesgue's dominated convergence,

$$\lim_{h \rightarrow \infty} \mathbb{E} [l(y_{k,h}^*, \lambda_{k,h}^*, X_0)] = \mathbb{E} [l(y_k^*, \lambda_k^*, X_0)].$$

Notice that for any  $\mathbb{Q} \in \mathbb{P}(\mathcal{X})$ , the distance between the saddle point of  $L_k$  w.r.t.  $\mathbb{Q}$  and the saddle point of  $L$  w.r.t.  $\mathbb{Q}$  converges to 0 as  $k$  approaches  $\infty$ . To see this, notice that

$$\begin{aligned} \min_{y \in \mathcal{Y}} \max_{\lambda \in \Lambda} L(y, \lambda, \mathbb{Q}) - \frac{\|\lambda_{\max}\|^2}{k} &\leq \min_{y \in \mathcal{Y}} \max_{\lambda \in \Lambda} L_k(y, \lambda, \mathbb{Q}) \\ &\leq \min_{y \in \mathcal{Y}} \max_{\lambda \in \Lambda} L(y, \lambda, \mathbb{Q}) + \frac{E}{k} \end{aligned}$$

for some constant  $E$ , since  $\mathcal{Y}$  is bounded. The last part in our proof will be to show that if  $(\hat{y}_k^*, \hat{\lambda}_k^*)$  is the minimax of  $L$  w.r.t.  $\mathbb{P}_{\{X_0 | X_{-k}^{-1}\}}$ , then as  $k$  approaches  $\infty$ ,  $\mathbb{E} \left[ l \left( \hat{y}_k^*, \hat{\lambda}_k^*, X_0 \right) \right]$  will converge a.s. to  $\mathcal{V}^*$  and so  $\mathbb{E} [l(y_k^*, \lambda_k^*, X_0)]$ .

To show this, we will use the sub-martingale convergence theorem twice. First, we define  $Z_k$  as

$$Z_k \triangleq \min_{y \in \mathcal{Y}(\cdot)} \mathbb{E} \left[ \max_{\lambda \in \Lambda(\cdot)} \mathbb{E} [l(y, \lambda, X_0) | X_{-\infty}^{-1}] | X_{-k}^{-1} \right],$$

where the minimum is taken w.r.t. all  $\sigma(X_{-k}^{-1})$ -measurable strategies and the maximum is taken w.r.t. all  $\sigma(X_{-\infty}^{-1})$ -measurable strategies. Notice that  $Z_k$  is a super-martingale. We can see this by using the tower property of conditional expectations,

$$\mathbb{E}[Z_{k+1} | X_{-k}^{-1}] = \mathbb{E} [\mathbb{E} [Z_{k+1} | X_{-k-1}^{-1}] | X_{-k}^{-1}]$$

and since  $Z_{k+1}$  is the optimal choice in  $\mathcal{Y}$  w.r.t. to  $X_{-k-1}^{-1}$ ,

$$\leq \mathbb{E} [\mathbb{E}[Z_k | X_{-k-1}^{-1}] | X_{-k}^{-1}] = \mathbb{E}[Z_k | X_{-k}^{-1}] = Z_k.$$

Note also that  $\mathbb{E}[Z_k]$  is uniformly bounded. Therefore, we can apply the super-martingale convergence theorem and get that  $Z_k \rightarrow Z_\infty$  a.s., where,

$$Z_\infty = \mathbb{E} [l(y_\infty^*, \lambda_\infty^*, X_0) | X_{-\infty}^{-1}] = \mathcal{V}^*,$$

and by using Lebesgue's dominated convergence theorem, also  $\mathbb{E}[Z_k] \rightarrow \mathbb{E}[Z_\infty] = \mathcal{V}^*$ . Using the same arguments,  $Z'_k$ , defined as

$$Z'_k \triangleq \max_{\lambda \in \Lambda(\cdot)} \mathbb{E} \left[ \min_{y \in \mathcal{Y}(\cdot)} \mathbb{E} [l(y, \lambda, X_0) | X_{-\infty}^{-1}] | X_{-k}^{-1} \right],$$

where the maximum is taken w.r.t. all  $\sigma(X_{-k}^{-1})$ -measurable strategies and the minimum is taken w.r.t. all  $\sigma(X_{-\infty}^{-1})$ -measurable strategies, is a sub-martingale that also converges a.s. to  $Z_\infty$  and thus  $\mathbb{E}[Z'_k] \rightarrow \mathbb{E}[Z_\infty] = \mathcal{V}^*$ .

We conclude the proof by noticing that the following relation holds for any  $k$ ,

$$\begin{aligned} \mathbb{E}[Z'_k] &= \mathbb{E} \left[ \max_{\lambda \in \Lambda(\cdot)} \mathbb{E} \left[ \min_{y \in \mathcal{Y}(\cdot)} \mathbb{E} [l(y, \lambda, X_0) | X_{-\infty}^{-1}] | X_{-k}^{-1} \right] \right] \\ &\leq \mathbb{E} \left[ \max_{\lambda \in \Lambda(\cdot)} \mathbb{E} \left[ \mathbb{E} [l(\hat{y}_k^*, \lambda, X_0) | X_{-\infty}^{-1}] | X_{-k}^{-1} \right] \right] \\ &= \mathbb{E} \left[ \max_{\lambda \in \Lambda(\cdot)} \mathbb{E} [l(\hat{y}_k^*, \lambda, X_0) | X_{-k}^{-1}] \right] = \mathbb{E} [l(\hat{y}_k^*, \hat{\lambda}_k^*, X_0)], \end{aligned}$$

and using similar arguments we can show that also

$$\mathbb{E} [l(\hat{y}_k^*, \hat{\lambda}_k^*, X_0)] \leq \mathbb{E}[Z_k],$$

and since both  $\mathbb{E}[Z_k]$  and  $\mathbb{E}[Z'_k]$  converge to  $\mathcal{V}^*$ , we get the desired result.  $\square$

## 4 Proof of Theorem 3

Before proving the main theorem regarding MHA, we now state and prove the following lemma, which is used in the proof of the main result regarding MHA.

**Lemma 4.** *Let  $\{H_{k,h}\}$  be a countable set of experts as defined in the proof of Theorem 2. Then, the following relation holds a.s.:*

$$\begin{aligned} \inf_{k,h} \limsup_{n \rightarrow \infty} \frac{1}{N} \sum_{i=1}^N l(y_{k,h}^i, \lambda_i, X_i) &\leq \mathcal{V}^* \\ &\leq \sup_{k,h} \liminf_{n \rightarrow \infty} \frac{1}{N} \sum_{i=1}^N l(y_i, \lambda_{k,h}^i, X_i), \end{aligned}$$

where  $(y_i, \lambda_i)$  are the predictions of MHA when applied on  $\{H_{k,h}\}$ .

*Proof.* Set

$$f(y, \mathbb{Q}) \triangleq \max_{\lambda \in \Lambda} \mathbb{E}_{\mathbb{Q}} [l(y, \lambda, X_0)].$$

We will start from the LHS,

$$\inf_{k,h} \limsup_{n \rightarrow \infty} \frac{1}{N} \sum_{i=1}^N l(y_{k,h}^i, \lambda_i, X_i), \quad (10)$$

and similarly to Lemma 1, by using the strong law of large numbers we can write

$$\begin{aligned} (10) &= \inf_{k,h} \limsup_{n \rightarrow \infty} \frac{1}{N} \sum_{i=1}^N \mathbb{E} [l(y_{k,h}^i, \lambda_i, X_0) \mid X_{1-i}^{-1}] \\ &\leq \inf_{k,h} \limsup_{n \rightarrow \infty} \frac{1}{N} \sum_{i=1}^N f(y_{k,h}^i, \mathbb{P}_{X_0 \mid X_{1-i}^{-1}}) \text{ a.s.} \end{aligned} \quad (11)$$

For fixed  $k, h > 0$ , from the proof of Theorem (2),  $y_{k,h}^i \rightarrow y_{k,h}^*$  a.s. as  $i$  approaches  $\infty$ , and from Levy's zero-one law also  $\mathbb{P}_{X_0 \mid X_{1-i}^{-1}} \rightarrow \mathbb{P}_{\infty}$  weakly. From Lemma 2 we know that  $f$  is continuous, therefore, we can apply Lemma 1 and get that

$$(11) = \inf_{k,h} \mathbb{E} [\mathbb{E} [f(y_{k,h}^*, \mathbb{P}_{\infty})]] \leq \lim_{k \rightarrow \infty} \lim_{h \rightarrow \infty} \mathbb{E} [f(y_{k,h}^*, \mathbb{P}_{\infty})]. \quad (12)$$

From the uniqueness of the saddle point and from the proof of Theorem (2), for fixed  $k > 0$ ,

$$\lim_{h \rightarrow \infty} y_{k,h}^* \rightarrow y_k^*$$

a.s.. Thus, from the continuity of  $f$  we get that

$$\lim_{h \rightarrow \infty} f(y_{k,h}^*, \mathbb{P}_{\infty}) \rightarrow f(y_k^*, \mathbb{P}_{\infty})$$

and again by Lebesgue's dominated convergence,

$$(12) = \lim_{k \rightarrow \infty} \mathbb{E} [f(y_k^*, \mathbb{P}_{\infty})] = \lim_{k \rightarrow \infty} \mathbb{E} \left[ \max_{\lambda \in \Lambda} \mathbb{E}_{\mathbb{P}_{\infty}} [l(y_k^*, \lambda, X_0)] \right]. \quad (13)$$

Now, from Theorem 2 we know that every accumulation point of the sequence  $\{y_k^*\}$  is in the optimal set

$$\arg \min_{y \in \mathcal{Y}} \left( \max_{\lambda \in \Lambda} \mathbb{E}_{\mathbb{P}_{\infty}} [l(y, \lambda, X_0)] \right).$$

Therefore a.s.

$$\lim_{k \rightarrow \infty} \max_{\lambda \in \Lambda} \mathbb{E}_{\mathbb{P}_{\infty}} [l(y_k^*, \lambda, X_0)] \rightarrow \mathbb{E}_{\mathbb{P}_{\infty}} [l(y_{\infty}^*, \lambda_{\infty}^*, X_0)],$$

and using Lebesgue's dominated convergence,

$$(13) = \mathbb{E} [\mathbb{E}_{\mathbb{P}_{\infty}} [l(y_{\infty}^*, \lambda_{\infty}^*, X_0)]] = \mathcal{V}^*.$$

Using similar arguments, we can show the second part of the lemma.

□

We are now ready to state and prove the optimality of MHA.

**Theorem 3** (Optimality of MHA). *Let  $(y_i, \lambda_i)$  be the predictions generated by MHA when applied on  $\{H_{k,h}\}$  as defined in the proof of Theorem 2. Then, for any  $\gamma$ -feasible process  $\{X_i\}_{i=1}^\infty$ : MHA is a  $\gamma$ -bounded and  $\gamma$ -universal strategy.*

*Proof.* We first show that

$$\lim_{N \rightarrow \infty} \frac{1}{N} \sum_{i=1}^N l(y_i, \lambda_i, X_i) = \mathcal{V}^* \text{ a.s.} \quad (14)$$

Applying Lemma 5 in [6], we know that the  $x$  updates guarantee that for every expert  $H_{k,h}$ ,

$$\frac{1}{N} \sum_{i=1}^N l(y_i, \lambda_i, x_i) \leq \frac{1}{N} \sum_{i=1}^N l(y_{k,h}^i, \lambda_i, x_i) + \frac{C_{k,h}}{\sqrt{N}} \quad (15)$$

$$\frac{1}{N} \sum_{i=1}^N l(y_i, \lambda_i, x_i) \geq \frac{1}{N} \sum_{i=1}^N l(y_i, \lambda_{k,h}^i, x_i) - \frac{C'_{k,h}}{\sqrt{N}}, \quad (16)$$

where  $C_{k,h}, C'_{k,h} > 0$  are some constants independent of  $N$ . In particular, using Equation (15),

$$\frac{1}{N} \sum_{i=1}^N l(y_i, \lambda_i, x_i) \leq \inf_{k,h} \left( \frac{1}{N} \sum_{i=1}^N l(y_{k,h}^i, \lambda_i, x_i) + \frac{C_{k,h}}{\sqrt{N}} \right).$$

Therefore, we get

$$\begin{aligned} & \limsup_{N \rightarrow \infty} \frac{1}{N} \sum_{i=1}^N l(y_i, \lambda_i, x_i) \\ & \leq \limsup_{N \rightarrow \infty} \inf_{k,h} \left( \frac{1}{N} \sum_{i=1}^N l(y_{k,h}^i, \lambda_i, x_i) + \frac{C_{k,h}}{\sqrt{N}} \right) \\ & \leq \inf_{k,h} \limsup_{N \rightarrow \infty} \left( \frac{1}{N} \sum_{i=1}^N l(y_{k,h}^i, \lambda_i, x_i) + \frac{C_{k,h}}{\sqrt{N}} \right) \\ & \leq \inf_{k,h} \limsup_{N \rightarrow \infty} \left( \frac{1}{N} \sum_{i=1}^N l(y_{k,h}^i, \lambda_i, x_i) \right), \end{aligned} \quad (17)$$

where in the last inequality we used the fact that  $\limsup$  is sub-additive. Using Lemma (4), we get that

$$\begin{aligned} & (17) \leq \mathcal{V}^* \\ & \leq \sup_{k,h} \liminf_{n \rightarrow \infty} \frac{1}{N} \sum_{i=1}^N l(y_i, \lambda_{k,h}^i, X_i). \end{aligned} \quad (18)$$

Using similar arguments and using Equation (16) we can show that

$$(18) \leq \liminf_{N \rightarrow \infty} \frac{1}{N} \sum_{i=1}^N l(y_i, \lambda_i, x_i).$$

Summarizing, we have

$$\limsup_{N \rightarrow \infty} \frac{1}{N} \sum_{i=1}^N l(y_i, \lambda_i, x_i) \leq \mathcal{V}^* \leq \liminf_{N \rightarrow \infty} \frac{1}{N} \sum_{i=1}^N l(y_i, \lambda_i, x_i).$$



Therefore, we can conclude that a.s.

$$\lim_{N \rightarrow \infty} \frac{1}{N} \sum_{i=1}^N l(y_i, \lambda_i, X_i) = \mathcal{V}^*.$$

To show that MHA is indeed a  $\gamma$ -bounded strategy and to shorten the notation, we will denote

$$g(y, \lambda, x) \triangleq \lambda(c(y, x) - \gamma).$$

First, from Equation (16) applied on the expert  $H_{0,0}$ , we get that:

$$\limsup_{N \rightarrow \infty} \frac{1}{N} \sum_{i=1}^N g(y_i, \lambda_{\max}, x) \leq \limsup_{N \rightarrow \infty} \frac{1}{N} \sum_{i=1}^N g(y_i, \lambda_i, x). \quad (19)$$

Moreover, since  $l$  is uniformly continuous, for any given  $\epsilon > 0$ , there exists  $\delta > 0$ , such that if  $|\lambda' - \lambda| < \delta$ , then

$$|l(y, \lambda', x) - l(y, \lambda, x)| < \epsilon$$

for any  $y \in \mathcal{Y}$  and  $x \in \mathcal{X}$ . We also know that

$$\lim_{k \rightarrow \infty} \lim_{h \rightarrow \infty} \lim_{i \rightarrow \infty} \lambda_{k,h}^i = \lambda_\infty^*.$$

Therefore, there exist  $k_0, h_0, i_0$  such that  $|\lambda_{k_0, h_0}^i - \lambda_\infty^*| < \delta$  for any  $i > i_0$ . Since  $\lim_{k \rightarrow \infty} \lambda_k^* = \lambda_\infty^*$  there exists  $k_0$  such that  $|\lambda_{k_0}^* - \lambda_\infty^*| < \frac{\delta}{3}$ . Note that  $\lim_{h \rightarrow \infty} \lambda_{k_0, h}^* = \lambda_{k_0}^*$ , so there exists  $h_0$  such that  $|\lambda_{k_0, h_0}^* - \lambda_{k_0}^*| < \frac{\delta}{3}$ . Finally, since  $\lim_{i \rightarrow \infty} \lambda_{k_0, l_0}^i = \lambda_{k_0, l_0}^*$ , there exists  $i_0$  such that if  $i > i_0$ , then  $|\lambda_{k_0, l_0}^i - \lambda_{k_0, l_0}^*| < \frac{\delta}{3}$ . Combining all the above, we get that for  $k_0, h_0, i_0$  if  $i > i_0$ , then

$$|\lambda_{k_0, h_0}^i - \lambda_\infty^*| < |\lambda_{k_0, h_0}^i - \lambda_{k_0, h_0}^*| + |\lambda_{k_0, h_0}^* - \lambda_{k_0}^*| + |\lambda_{k_0}^* - \lambda_\infty^*| < \delta.$$

Therefore,

$$\begin{aligned} & \limsup_{N \rightarrow \infty} \left( \frac{1}{N} \sum_{i=1}^N l(y_i, \lambda_\infty^*, x_i) - \frac{1}{N} \sum_{i=1}^N l(y_i, \lambda_i, x_i) \right) \leq \\ & \limsup_{N \rightarrow \infty} \left( \frac{1}{N} \sum_{i=1}^N l(y_i, \lambda_\infty^*, x_i) - \frac{1}{N} \sum_{i=1}^N l(y_i, \lambda_{k_0, h_0}^i, x_i) \right) + \\ & \limsup_{N \rightarrow \infty} \left( \frac{1}{N} \sum_{i=1}^N l(y_i, \lambda_{k_0, h_0}^i, x_i) - \frac{1}{N} \sum_{i=1}^N l(y_i, \lambda_i, x_i) \right) \end{aligned} \quad (20)$$

From the uniform continuity we also learn that the first summand is bounded above by  $\epsilon$ , and from Equation (16), we get that the last summand is bounded above by 0. Thus,

$$(20) \leq \epsilon,$$

and since  $\epsilon$  is arbitrary, we get that

$$\limsup_{N \rightarrow \infty} \left( \frac{1}{N} \sum_{i=1}^N l(y_i, \lambda_\infty^*, x_i) - \frac{1}{N} \sum_{i=1}^N l(y_i, \lambda_i, x_i) \right) \leq 0.$$

Thus,

$$\limsup_{N \rightarrow \infty} \frac{1}{N} \sum_{i=1}^N l(y_i, \lambda_\infty^*, X_i) \leq \mathcal{V}^*,$$

and from Theorem 1 we can conclude that

$$\lim_{N \rightarrow \infty} \frac{1}{N} \sum_{i=1}^N l(y_i, \lambda_\infty^*, X_i) = \mathcal{V}^*.$$

Therefore, we can deduce that

$$\begin{aligned}
& \limsup_{N \rightarrow \infty} \frac{1}{N} \sum_{i=1}^N g(y_i, \lambda_i, x_i) - \limsup_{N \rightarrow \infty} \frac{1}{N} \sum_{i=1}^N g(y_i, \lambda_\infty^*, x_i) = \\
& \limsup_{N \rightarrow \infty} \frac{1}{N} \sum_{i=1}^N g(y_i, \lambda_i, x_i) + \liminf_{N \rightarrow \infty} \frac{1}{N} \sum_{i=1}^N -g(y_i, \lambda_\infty^*, x_i) \\
& \leq \limsup_{N \rightarrow \infty} \frac{1}{N} \sum_{i=1}^N g(y_i, \lambda_i, x_i) - \frac{1}{N} \sum_{i=1}^N g(y_i, \lambda_\infty^*, x_i) \\
& = \limsup_{N \rightarrow \infty} \frac{1}{N} \sum_{i=1}^N l(y_i, \lambda_i, x_i) - \frac{1}{N} \sum_{i=1}^N l(y_i, \lambda_\infty^*, x_i) = 0,
\end{aligned}$$

which results in

$$\limsup_{N \rightarrow \infty} \frac{1}{N} \sum_{i=1}^N g(y_i, \lambda_i, x_i) \leq \limsup_{N \rightarrow \infty} \frac{1}{N} \sum_{i=1}^N g(y_i, \lambda_\infty^*, x_i).$$

Combining the above with Equation (19), we get that

$$\begin{aligned}
& \limsup_{N \rightarrow \infty} \frac{1}{N} \sum_{i=1}^N g(y_i, \lambda_{\max}, x_i) \\
& \leq \limsup_{N \rightarrow \infty} \frac{1}{N} \sum_{i=1}^N g(y_i, \lambda_\infty^*, x_i).
\end{aligned}$$

Since  $0 \leq \lambda_\infty^* < \lambda_{\max}$ , we get that MHA is  $\gamma$ -bounded. This also implies that

$$\limsup_{N \rightarrow \infty} \frac{1}{N} \sum_{i=1}^N \lambda_i (c(y_i, x_i) - \gamma) \leq 0.$$

Now, if we apply Equation (16) on the expert  $H_{-1, -1}$ , we get that

$$\liminf_{N \rightarrow \infty} \frac{1}{N} \sum_{i=1}^N \lambda_i (c(y_i, x_i) - \gamma) \geq 0.$$

Thus,

$$\lim_{N \rightarrow \infty} \frac{1}{N} \sum_{i=1}^N \lambda_i (c(y_i, x_i) - \gamma) = 0,$$

and using Equation (14), we get that MHA is also  $\gamma$ -universal.

□

## References

- [1] P.H. Algoet and T.M. Cover. Asymptotic optimality and asymptotic equipartition properties of log-optimum investment. *The Annals of Probability*, pages 876–898, 1988.
- [2] D. Bertsekas and S. Shreve. *Stochastic optimal control: The discrete time case*, volume 23. Academic Press New York, 1978.
- [3] K. Fan. Minimax theorems. *Proceedings of the National Academy of Sciences*, 39(1):42–47, 1953.
- [4] L. Györfi and G. Lugosi. Strategies for sequential prediction of stationary time series. In *Modeling uncertainty*, pages 225–248. Springer, 2005.
- [5] L. Györfi and D. Schäfer. Nonparametric prediction. *Advances in Learning Theory: Methods, Models and Applications*, 339:354, 2003.

- [6] Y. Kalnishkan and M. Vyugin. The weak aggregating algorithm and weak mixability. In *International Conference on Computational Learning Theory*, pages 188–203. Springer, 2005.
- [7] Y. Lou, Y. Hong, L. Xie, G. Shi, and K. Johansson. Nash equilibrium computation in subnetwork zero-sum games with switching communications. *IEEE Transactions on Automatic Control*, 61(10):2920–2935, 2016.
- [8] A. Nowak. Measurable selection theorems for minimax stochastic optimization problems. *SIAM Journal on Control and Optimization*, 23(3):466–476, 1985.
- [9] W. Stout. Almost sure convergence, vol. 24 of probability and mathematical statistics, 1974.
